# Supplementary material
Source: bioRxiv or medRxiv preprint supplement (https://www.biorxiv.org/highwire/filestream/121396/field_highwire_adjunct_files/0/401562-1.pdf)
Supplement: Supplementary file [file 401562-1.pdf]

## **Supplementary Information**

**Dias Gomes, Letzian et al.**

**Inventory:**

**Supplementary Figure 1, related to Figure 1**

**Supplementary Figure 2, related to Figure 3**

**Supplementary Figure 3, related to Figure 4**

**Supplementary Figure 4, related to Figure 5**

**Supplementary Table 1**

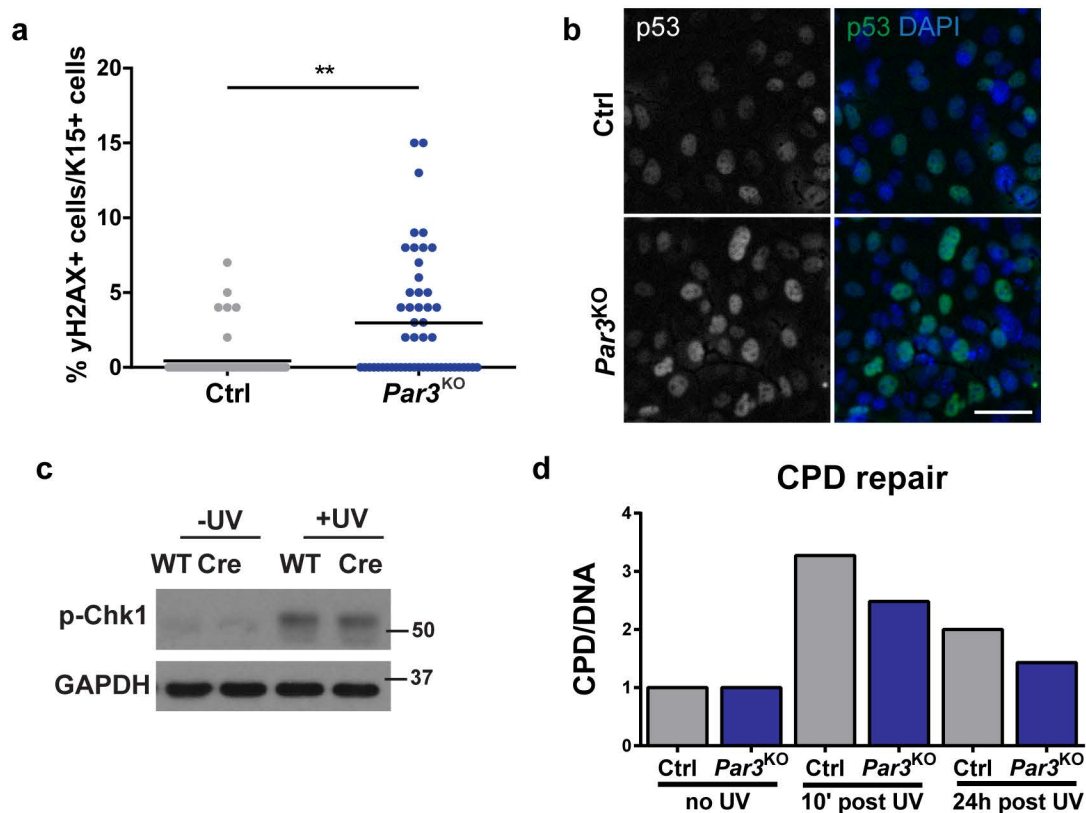

## Supplementary Figure 1, related to Figure 1.

**Loss of Par3 leads to increased DNA damage in hair follicle stem cells and ectopic activation of DNA damage responses.**

- (a) Percentage of  $\gamma$ H2AX-positive cells per Keratin15 positive bulge cells from 3  $Par3$  knockout ( $Par3^{eKO}$ : K14Cre/+; $Par3^{fl/fl}$ ) and control mice (K14Cre/+) ( $n=3$ ; \*\*,  $p=0.0014$ , mean number of  $\gamma$ H2AX-positive cells per K15+ bulge cells, students t-test).
- (b) p53 immunofluorescence micrographs of primary  $Par3^{KO}$  and control keratinocytes. DAPI was used to counterstain nuclei. Scale bar: 50 $\mu$ m. Micrographs were subjected to rolling ball background subtraction, radius=50 $\mu$ m.
- (c) Immunoblot analysis of pChk1 in control (K14Cre/+) and wildtype keratinocytes either non-treated or UV-B treated (100mJ/cm<sup>2</sup>).
- (d) DNA repair assay. Cyclobutane pyrimidine dimer (CPD) signal intensity from slot blot experiment normalized to total DNA. DNA was isolated from  $Par3^{KO}$  and control keratinocytes lysed at indicated time-points after UV-B irradiation (3mJ/cm<sup>2</sup>).

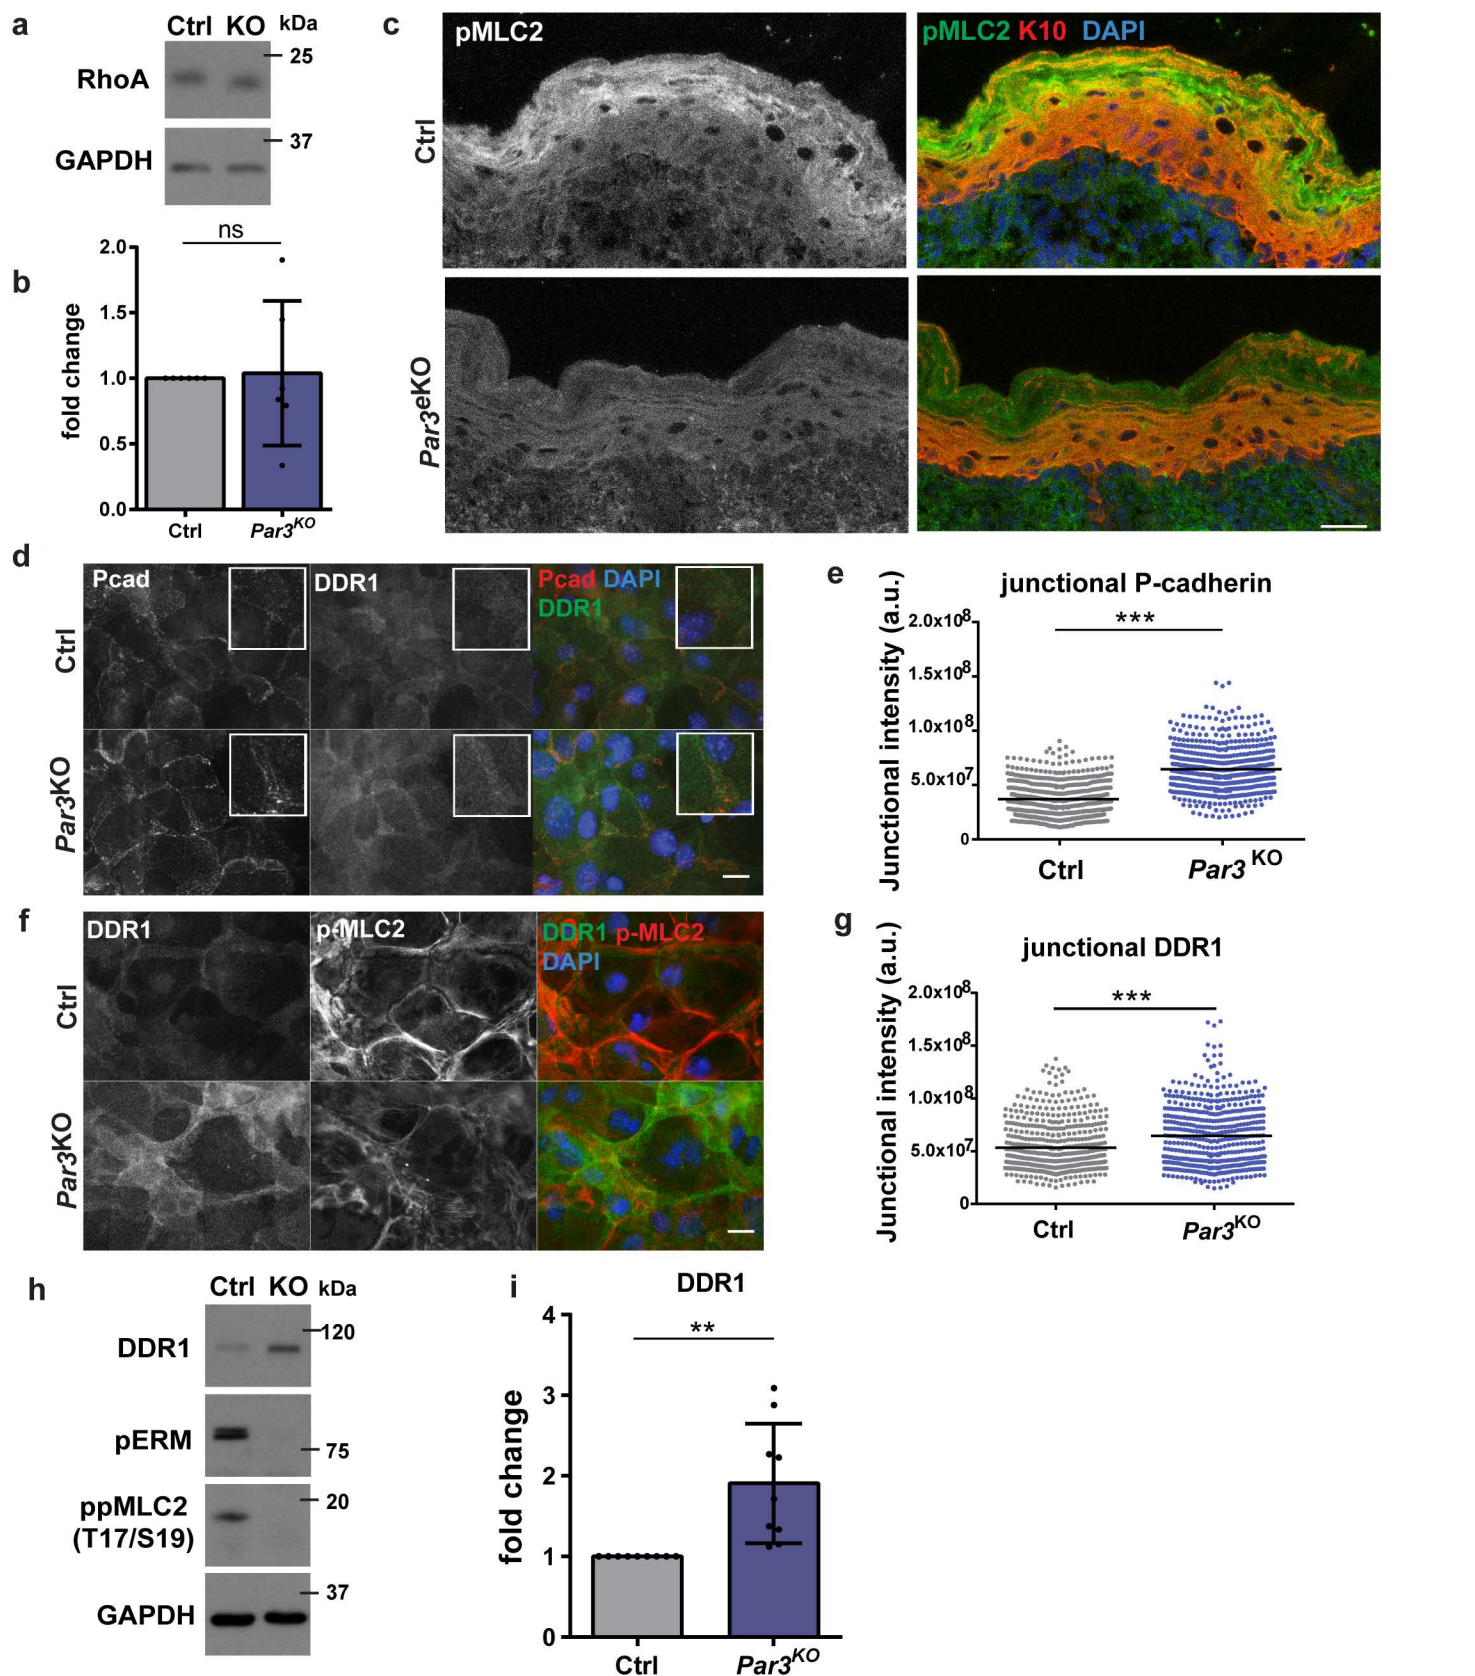

Supplementary Figure 2, related to Figure 3.

**Par3 inactivation reduces MLC phosphorylation in the epidermis and results in increase of P-cadherin and DDR1.**

- (a) Immunoblot analysis of RhoA in control and Par3KO keratinocytes. GAPDH was used as loading control.
- (b) Quantification of (a). RhoA levels were first normalized to GAPDH before all values were normalized to controls; (n=6; ns: p=0.6039; mean+SD, paired two-tailed-test).
- (c) Micrographs of P0 murine epidermis immunostained for pMLC2 (Ser19) and Keratin10 (K10), Scale bar: 50μm.
- (d) Immunofluorescence micrographs of P-cadherin and DDR1 in primary murine keratinocytes. Scale bar: 25μm.
- (e) Quantification of P-cadherin immunoreactivity at keratinocyte cell-cell junctions (intensity in arbitrary units, n=450 cells pooled from three independent experiments; \*\*\*, p=0.0002, two-tailed Mann-Whitney U test).
- (f) Immunofluorescence micrographs of primary keratinocytes stained for DDR1 and pMLC2 (Ser19). Scale bar: 25μm.
- (g) Quantification of DDR1 immunoreactivity at keratinocyte cell-cell junctions (intensity in arbitrary units, n=450 cells pooled from three independent experiments; \*\*\*, p=0.0002, two-tailed Mann-Whitney U test).
- (h) Immunoblot analysis of DDR1 in control and Par3KO keratinocytes. GAPDH served as loading control.
- (i) Quantification of (h). DDR1 protein levels were first normalized to GAPDH before all values were normalized to controls (n=9, paired student t-test, \*\*, p=0.0063, mean+SD, two-tailed t-test). Abbreviations used: Ctrl, control; ns, non-significant.

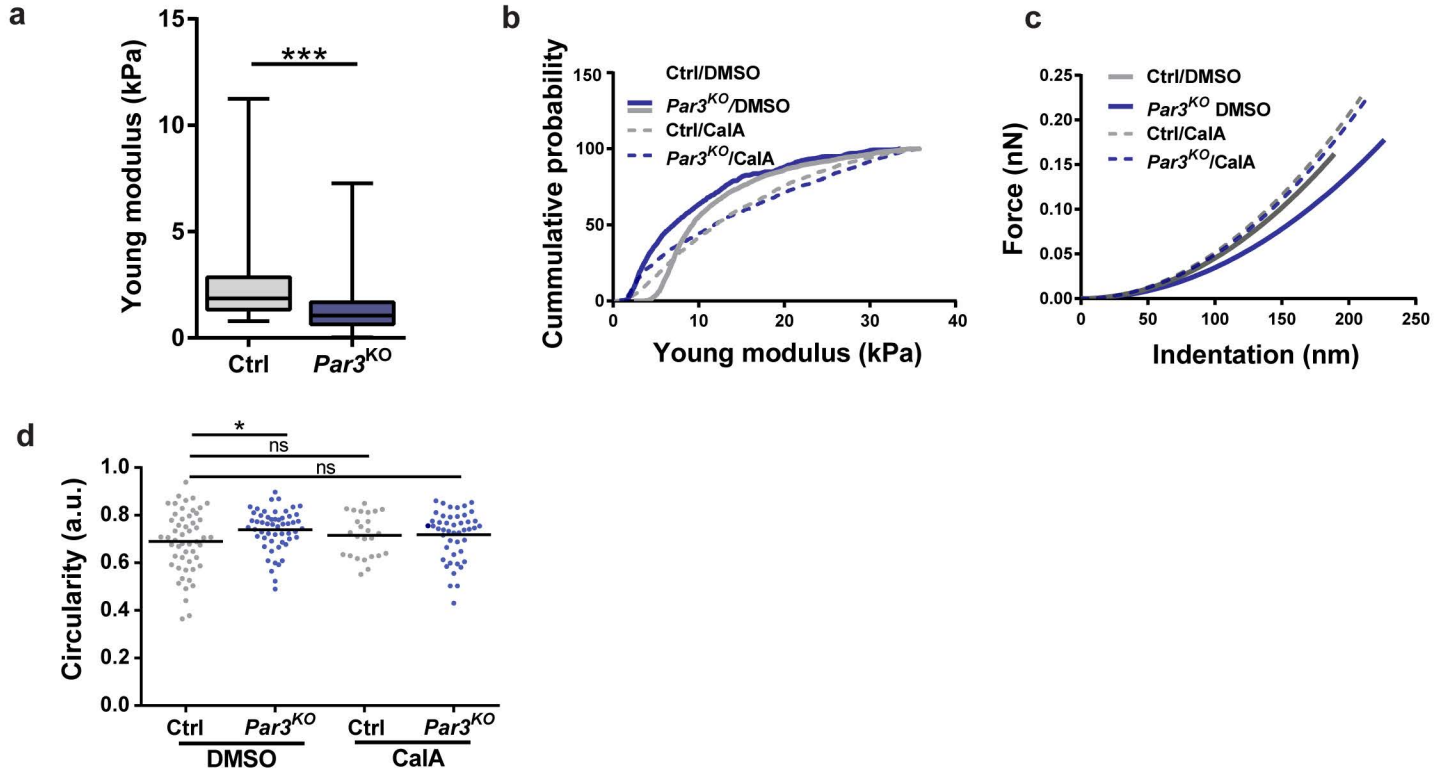

## Supplementary Figure 3, related to Figure 4.

**Altered viscoelastic properties of Par3-deficient primary keratinocytes.**

- (a) Young Modulus box-plot based on force indentation spectroscopy with a spherical tip ( $n > 500$  measurements, pooled from three independent experiments \*\*\*,  $p = 0.0001$ , Mann-Whitney U test, box plots show minimum, 25% percentile, median, 75% percentile and maximum).
- (b) Cumulative probability of Young Moduli extracted from Hertzian fits from force spectroscopy indentations ( $n = 2000$ , pooled across three independent experiments).
- (c) Indentation force plots showing mean Hertzian fits ( $n = 8$  representative force indents per condition).
- (d) Mitotic spindle circularity measurements in Ctrl and  $Par3^{KO}$  keratinocytes upon DMSO or CalA treatment ( $n > 25$ , pooled from four independent experiments, \*,  $p = 0.0432$  Ctrl/DMSO vs.  $Par3^{KO}$ /DMSO, ns,  $p = 0.6274$  Ctrl/DMSO vs. Ctrl/CalA, ns,  $p = 0.4082$  Ctrl/DMSO vs.  $Par3^{KO}$ /CalA, two-tailed one-way ANOVA).
- Abbreviations used: Ctrl, control; ns, non-significant; CalA, calyculin A.

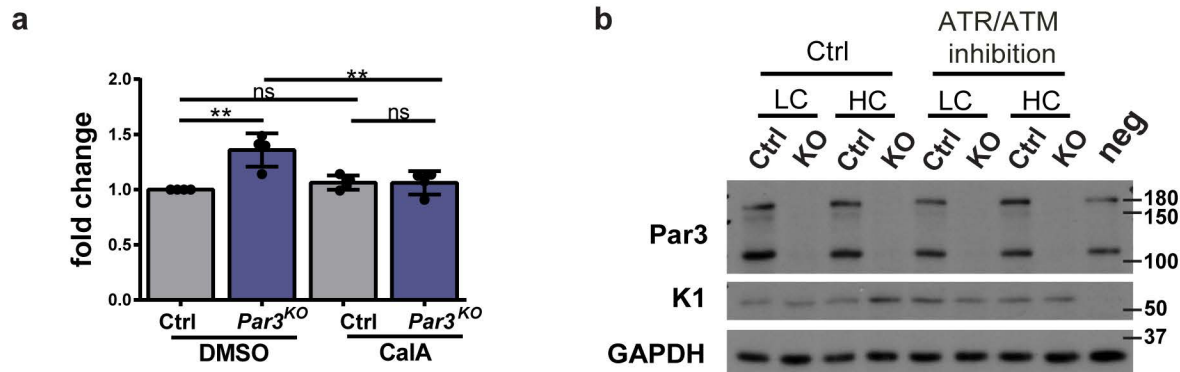

Supplementary Figure 4, related to Figure 5.

**Increased differentiation in Par3-deficient keratinocytes can be prevented by restoring actomyosin contractility or inhibiting DNA damage responses.**

(a) Differentiation assay. Differentiation was induced by switch to 1.8mM extracellular calcium ions in the culture medium (HC).

Quantification of the epidermal differentiation marker Involucrin. Protein levels were first normalized to GAPDH (loading control) before all values were normalized to controls. (n=5; ns: p=0.4254, \*\*, p=0.0022; mean+SD, two-way ANOVA Dunn's comparison test).

(b) Immunoblot analysis of differentiation marker Keratin1. Differentiation was induced by switch to 1.8mM extracellular calcium ions in the culture medium (HC). Inhibiting DNA damage responses using ATR/ATM inhibitors suppresses ectopic differentiation upon Par3 loss. GAPDH was used as loading control.

Abbreviations used: Ctrl, control; ns, non-significant; CalA, calyculin A; neg, negative control; ATM, Ataxia telangiectasia mutated; ATR, ATM and RAD3-related.

**Supplementary Table 1**      **Dias Gomes, Letzian et al.**

| <b>Primary antibodies (supplier)</b>                                 | <b>Catalog nr.</b> | <b>Clone/Ref.</b>      | <b>Lot nr.</b> | <b>Species</b> | <b>Dilution</b>       |
|----------------------------------------------------------------------|--------------------|------------------------|----------------|----------------|-----------------------|
| GAPDH (Millipore)                                                    | MAB374             | 6C5                    | 2322571        | mouse          | WB 1:18.000           |
| Keratin-1 (Covance)                                                  | PRB-165P           | Polyclonal             | N/A            | rabbit         | WB 1:1000             |
| p53 (Leica)                                                          | NCL-L-p53-CM5p     | Polyclonal             | 6044554        | rabbit         | IF 1:200              |
| p53 (Cell Signaling)                                                 | 2524               | 1C12                   | 10             | mouse          | 1:500                 |
| Par3 (Millipore)                                                     | 07-330             | Polyclonal             | 2615671        | rabbit         | IF 1: 400             |
| pMLC2 (Ser19) (Cell Signaling)                                       | 3675               | Polyclonal/<br>09/2016 | 5              | mouse          | IF 1:300              |
| ppMLC2 (Thr17Ser19) (Cell Signaling)                                 | 3674               | Polyclonal/<br>10/2017 | 5              | rabbit         | WB 1:1000<br>IF 1:300 |
| MLC2                                                                 | 3672               | Polyclonal/<br>09/2017 | 4              | rabbit         | WB 1:1000             |
| pEzrin (Thr567)/Radixin (Thr567)/Moesin (Thr558) (Cell Signaling)    | 3726               | 48G2/<br>01/2018       | 5              | rabbit         | IF 1:300              |
| pEzrin (Thr567)/Radixin (Thr567)/Moesin (Thr558) (Cell Signaling)    | 3141               | T558/<br>04/2018       | 15             | rabbit         | WB 1:1000             |
| pATR (Ser428) (Cell Signaling)                                       | 2853               | Polyclonal<br>02/2014  | 5              | rabbit         | WB 1:1000             |
| pChk1 (Ser345) (Cell Signaling)                                      | 2348               | 133D3/<br>09/2015      | 15             | rabbit         | WB 1:1000             |
| Chk1 (Cell Signaling)                                                | 2360               | 2G1D5/<br>10/2015      | 3              | mouse          | WB 1:1000             |
| γH2AX (S139) (Cell Signaling)                                        | 9718               | 20E3/<br>07/2017       | 13             | rabbit         | IF 1:500              |
| CPD (Cosmo Bio)                                                      | NM-DND-001         | TDM-2                  | TM-C-08        | mouse          | SB: 1:10000           |
| RhoA (Cell Signaling)                                                | 2117T              | 67B9                   | 5              | rabbit         | WB1:1000              |
| Involucrin (Covance)                                                 | PRB 140C-200       | Polyclonal             | N/A            | rabbit         | WB 1:1000             |
| DDR1 (Cell Signaling)                                                | 5583               | D1G6/<br>09/2017       | 3              | rabbit         | WB 1:1000<br>IF1:800  |
| Alpha-Tubulin (Sigma)                                                | T6793              | B-5-1-2                | 034M4837       | mouse          | IF 1:1000             |
| Pericentrin (BioLegend)                                              | 923701             | Poly 19237             | B200667        | rabbit         | IF 1:300              |
| <b>Secondary antibodies for immunofluorescence analyses</b>          |                    |                        |                |                |                       |
| AlexaFluor 488 α-mouse (Invitrogen)                                  | A21202             | Polyclonal             | 1741782        | donkey         | IF 1:500              |
| AlexaFluor 568 α-rabbit (Invitrogen)                                 | A11036             | Polyclonal             | 1832035        | goat           | IF 1:500              |
| AlexaFluor 568 α-rat (Invitrogen)                                    | A11077             | Polyclonal             | 870966         | goat           | IF 1:500              |
| AlexaFluor 594 anti-mouse (Invitrogen)                               | A21203             | Polyclonal             | 1165596        | donkey         | IF 1:500              |
| AlexaFluor 488 α-rabbit (Invitrogen)                                 | A21206             | Polyclonal             | 1910751        | donkey         | IF 1:500              |
| AlexaFluor 594 α-rabbit (Invitrogen)                                 | A21207             | Polyclonal             | N/A            | donkey         | IF 1:500              |
| AlexaFluor 488 α-guinea pig (Invitrogen)                             | A11073             | Polyclonal             | 1458631        | goat           | IF 1:500              |
| <b>Secondary antibodies for immunoblot analyses</b>                  |                    |                        |                |                |                       |
| HRP α-rabbit (GE Healthcare)                                         | NA9340V            | Polyclonal             | 9720820        | donkey         | WB 1:4000             |
| HRP α-mouse (GE Healthcare)                                          | NA931V             | Polyclonal             | 11076057       | sheep          | WB 1:4000             |
| <b>Other Reagents</b>                                                |                    |                        |                |                |                       |
| DAPI (Roth)                                                          | D1306              | N/A                    | N/A            | N/A            | 1mg/ml<br>(1:500)     |
| <b>iFISH probes:</b> Ttk2 (11qE1) / Aurka (2qH3) Mouse probe (Leica) | KBI-30501          | N/A                    | 59325          | DNA probe      | 1:1                   |
